# Supplementary material
Source: MDPI journal article supplement (https://www.mdpi.com/2311-7524/9/4/464)

A

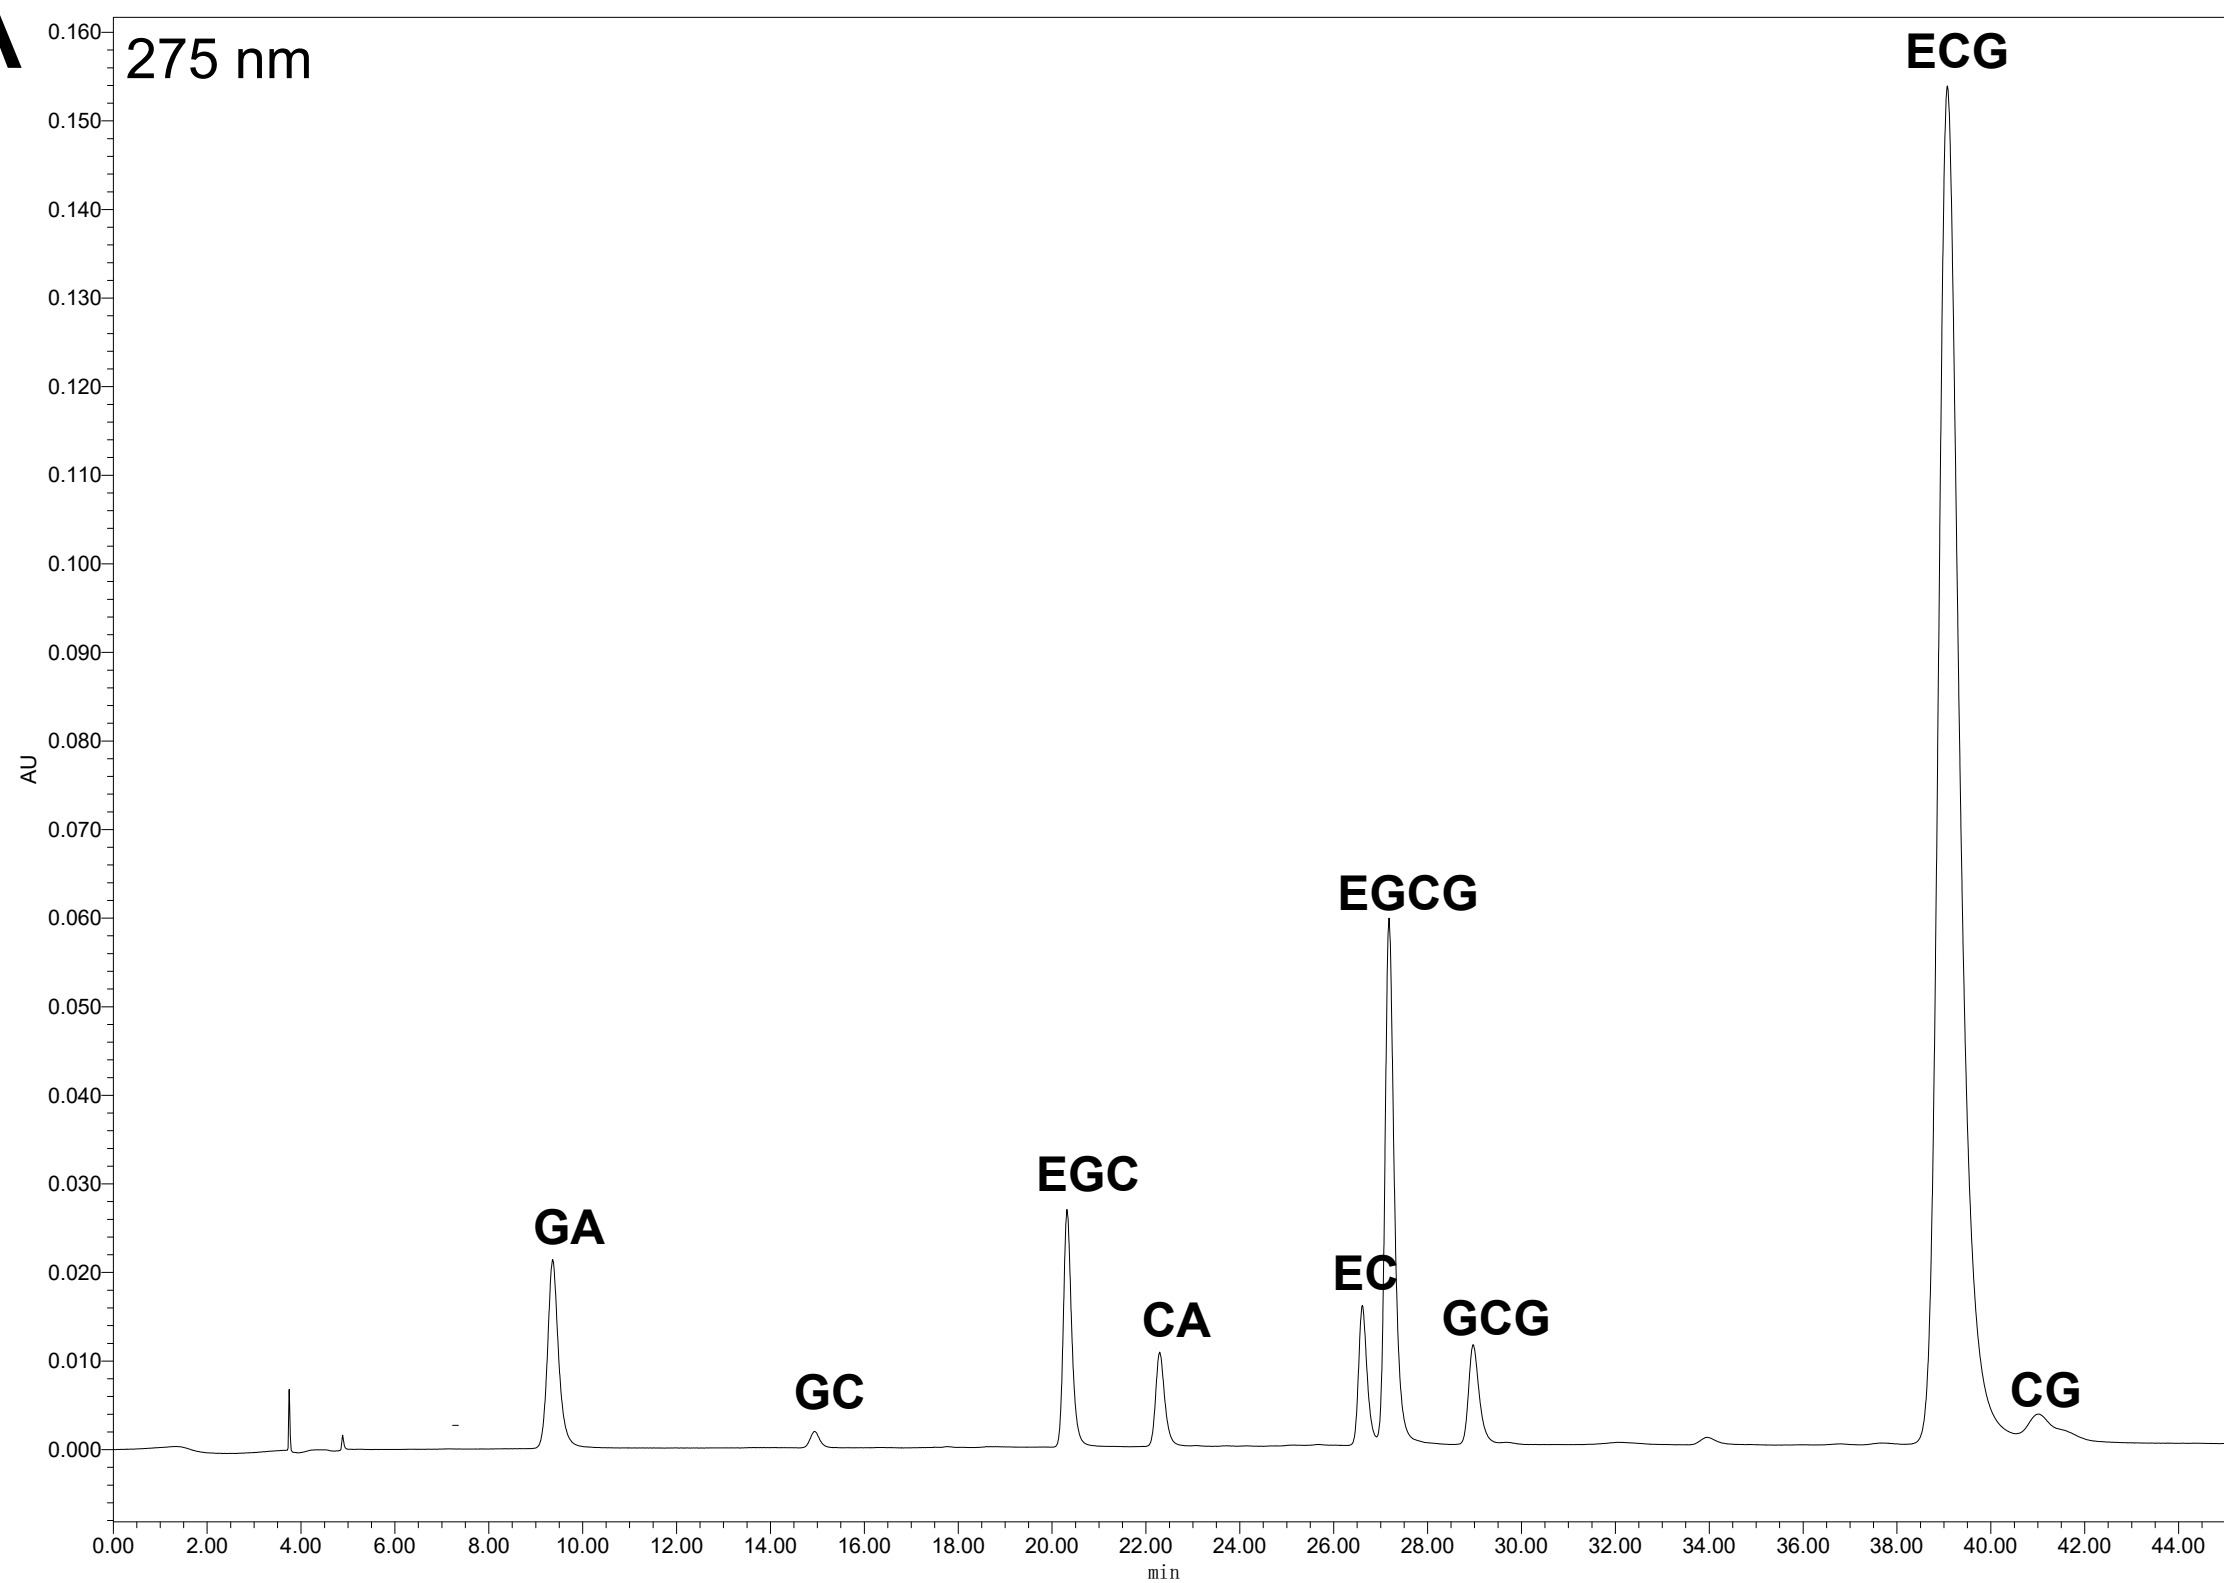

B

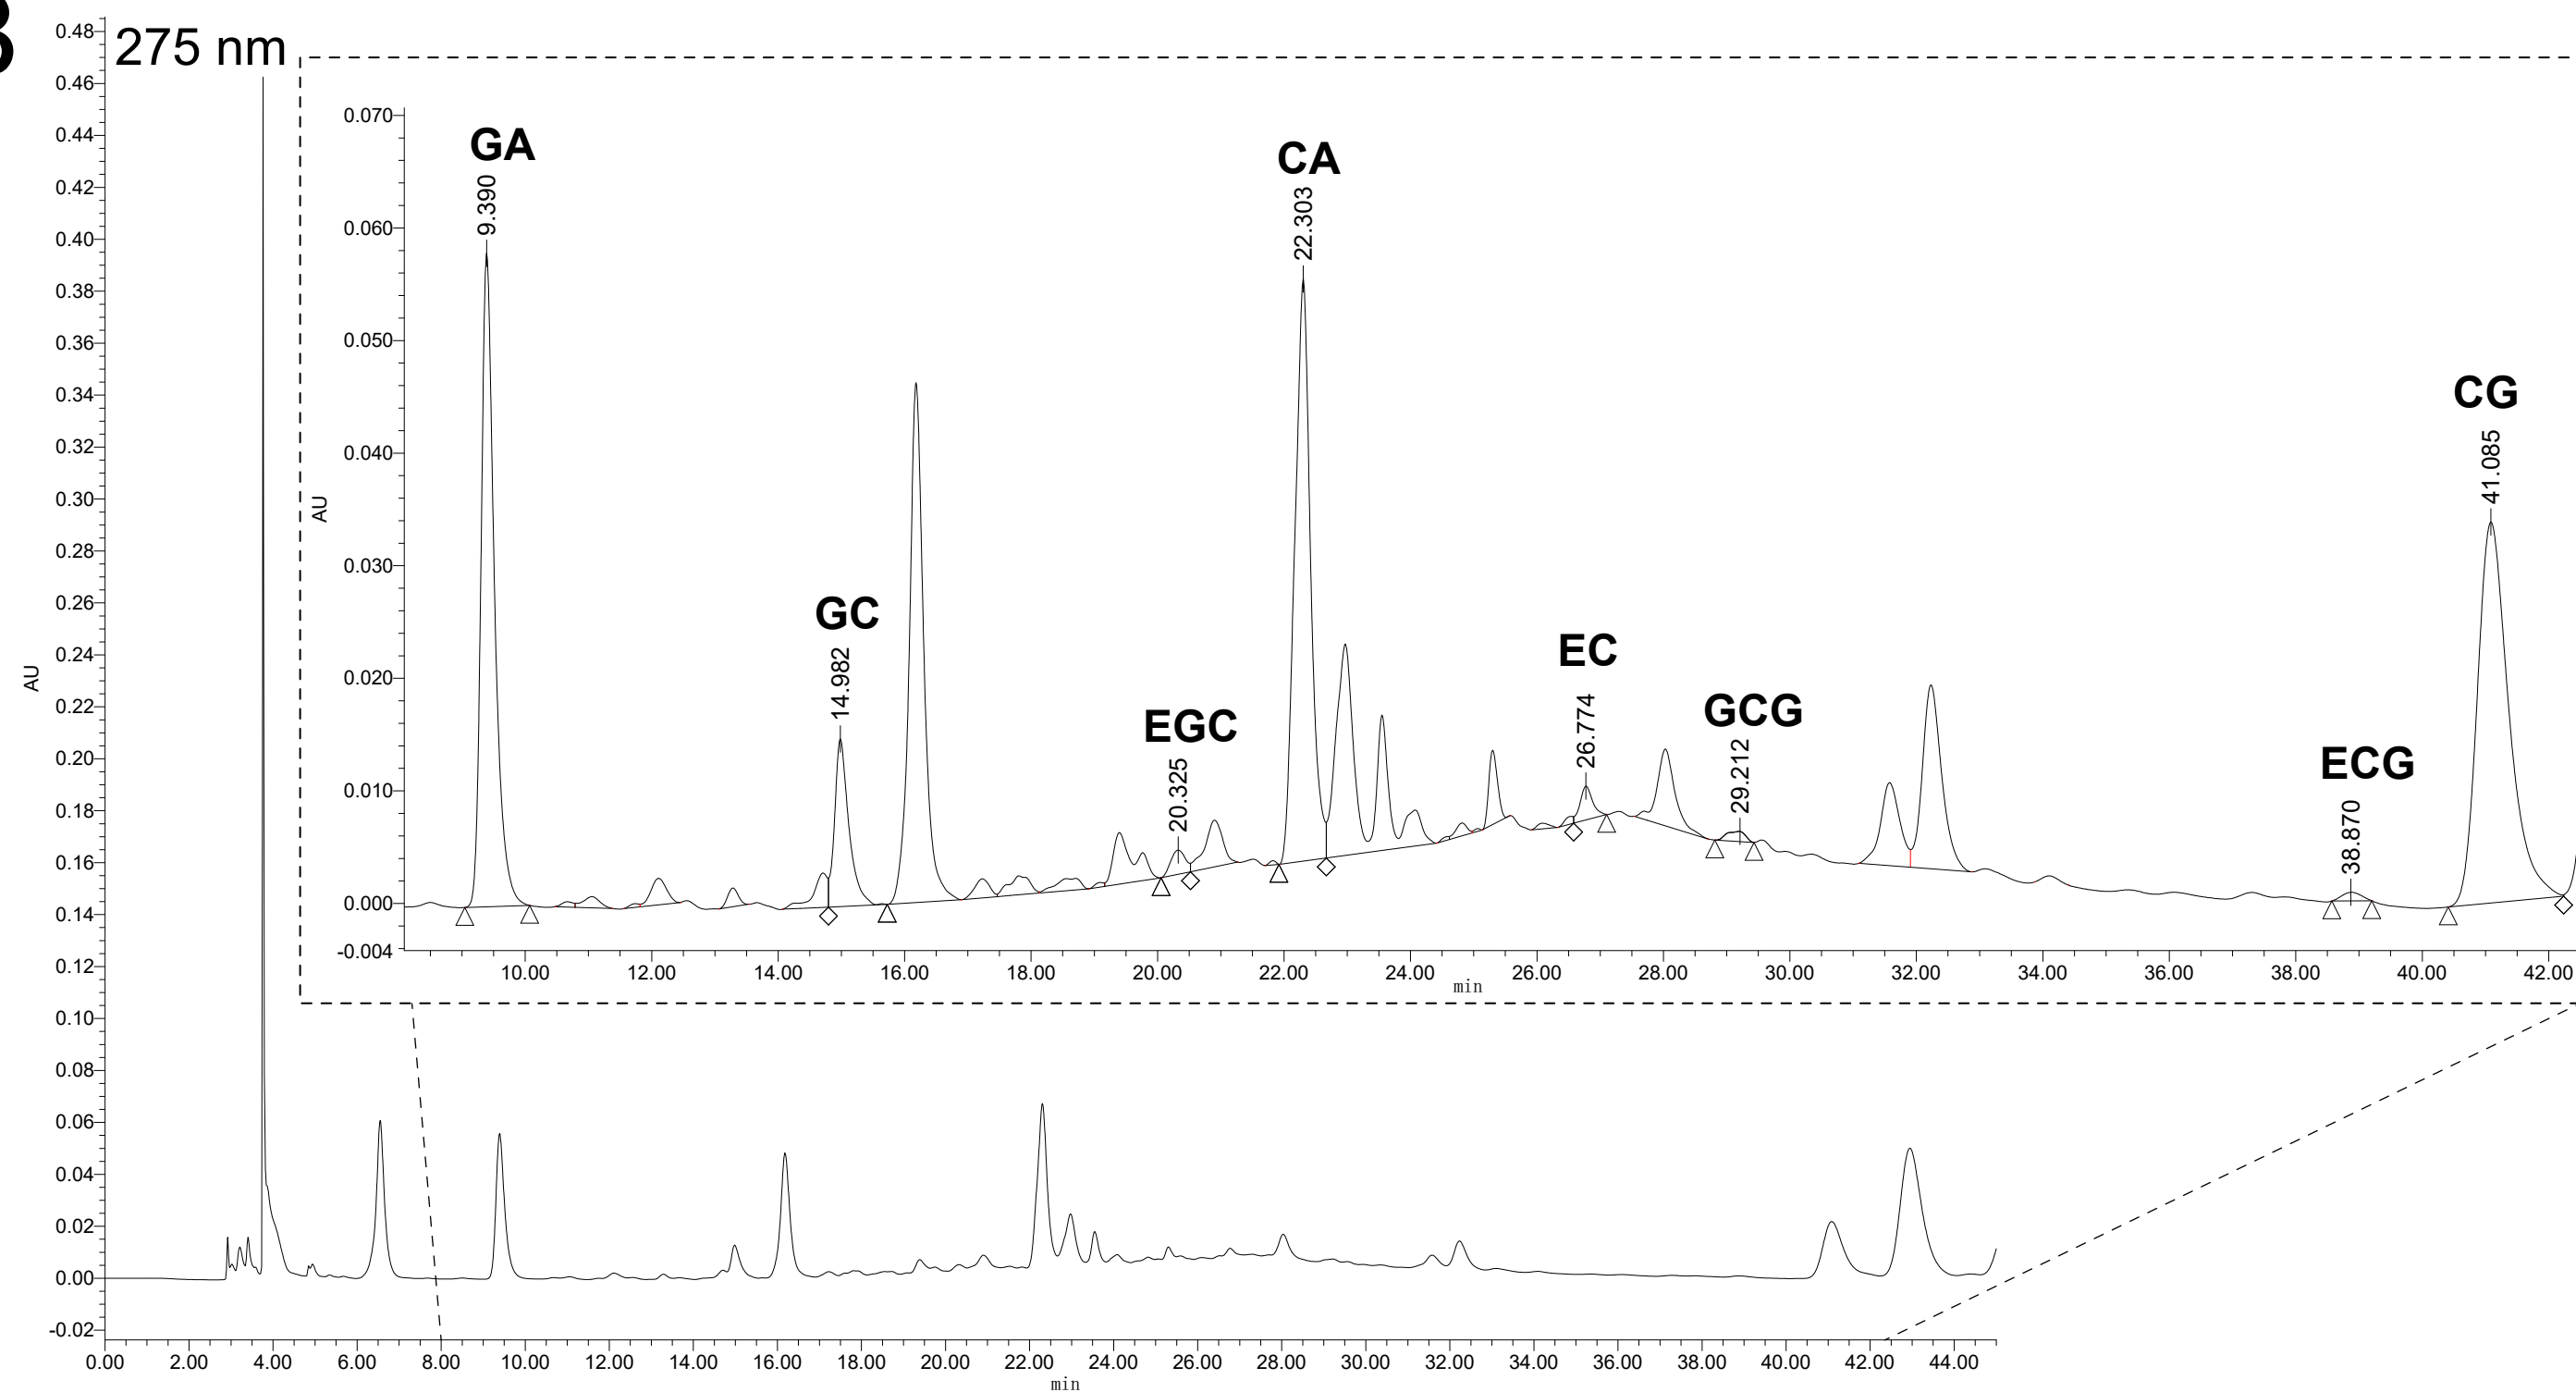

Supplement: s1 [file s1]
